# Supplementary material for: Self-assembled Co9S8/RGO-CNT interconnected architecture as composite electrode for supercapacitors
Source: Royal Society of Chemistry journal article supplement (doi:10.1039/c6ra27685g), 2017-01-01
Supplement: c6ra27685g2.pdf [file c6ra27685g2.pdf]

## Support Information

### Different Magnifications of TEM Image

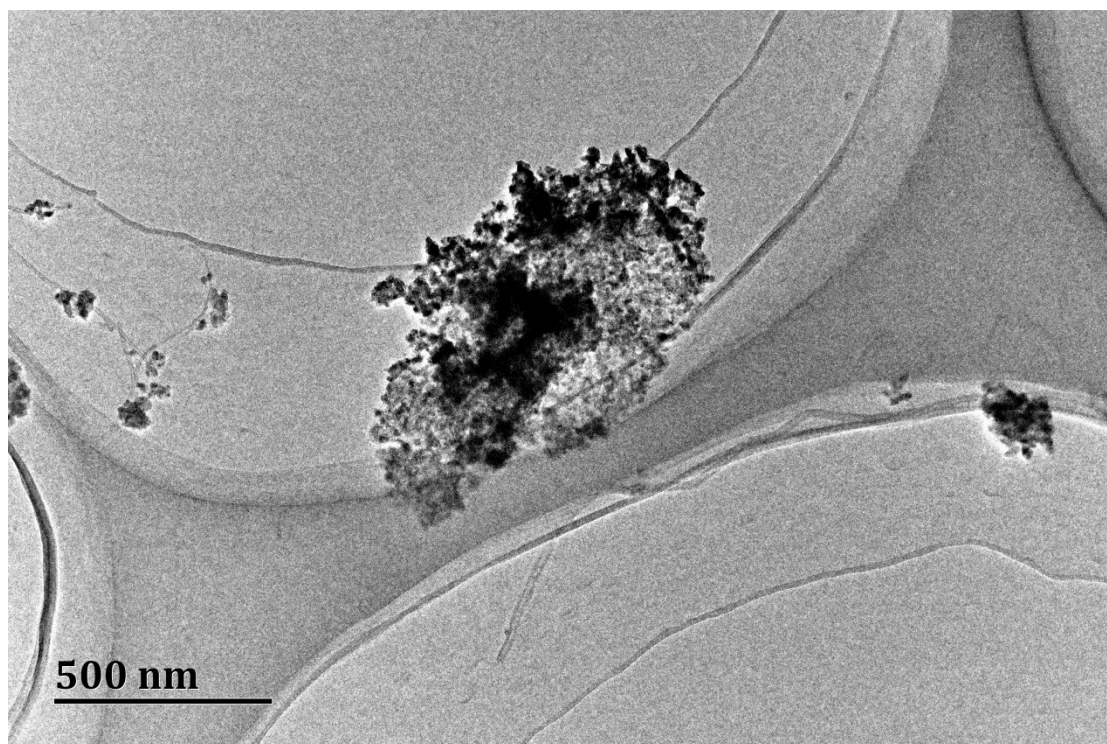

Figure 1 The TEM image of Co<sub>9</sub>S<sub>8</sub>/RGO

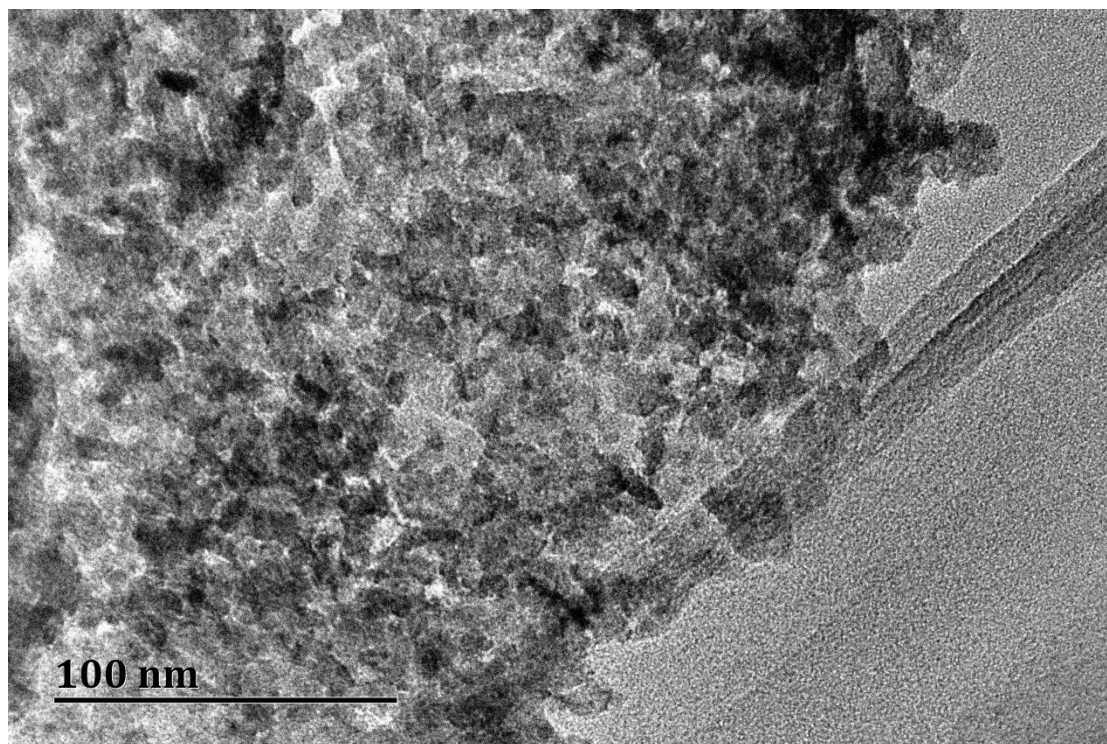

Figure 2 The TEM image of Co<sub>9</sub>S<sub>8</sub>/RGO

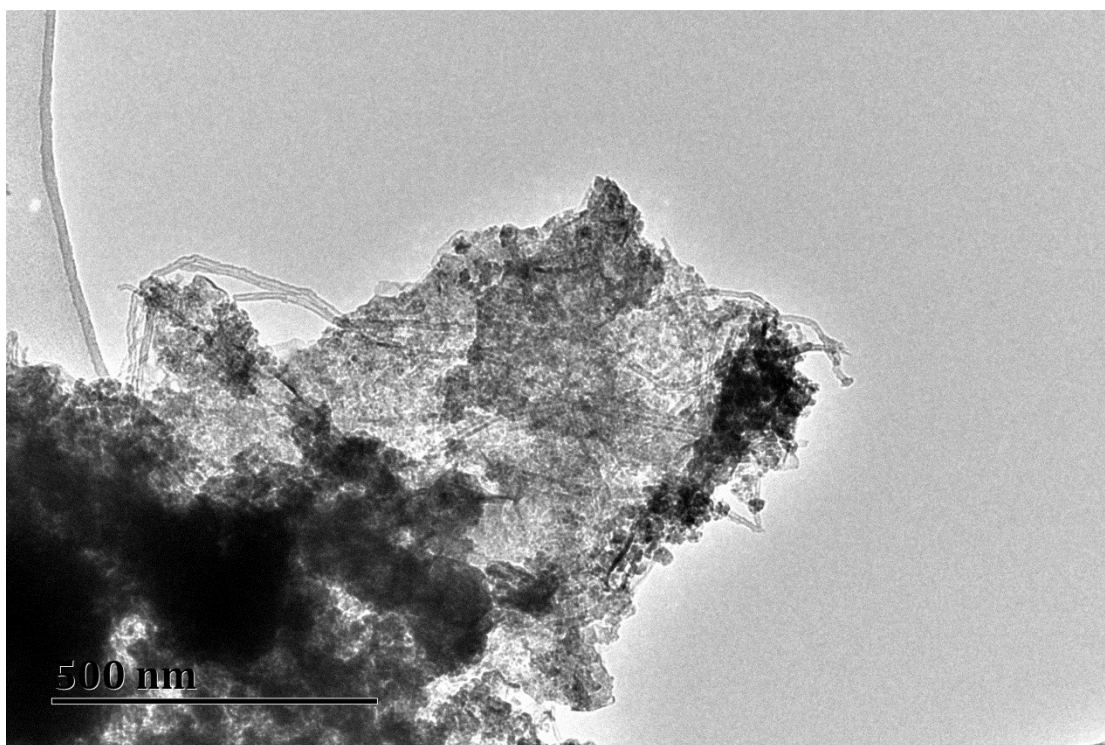

Figure 3 The TEM image of Co<sub>9</sub>S<sub>8</sub>/RGO-CNT

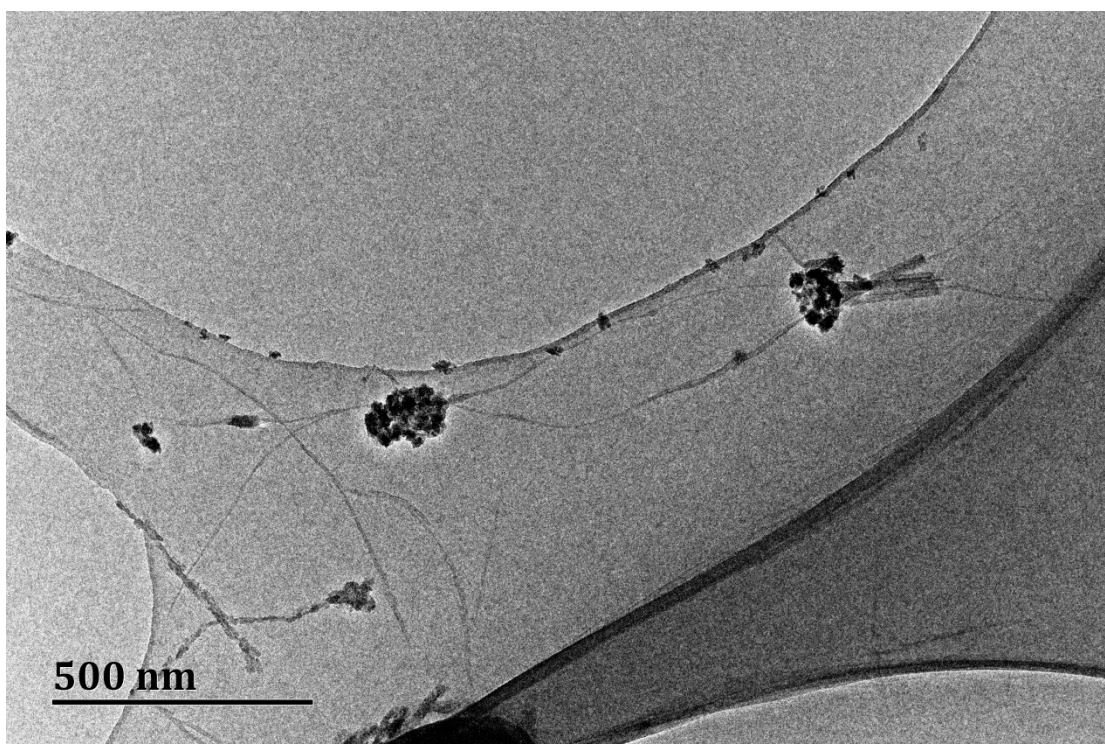

Figure 4 The TEM image of Co<sub>9</sub>S<sub>8</sub>/RGO-CNT
